# Supplementary material for: Daxx maintains endogenous retroviral silencing and restricts cellular plasticity in vivo
Source: PubMed Central journal article supplement — Sci Adv. 2020 Aug 5;6(32):eaba8415. doi: 10.1126/sciadv.aba8415 (PMC7406367; doi:10.1126/sciadv.aba8415), 2020-08-05
Supplement: aba8415_SM.pdf [file aba8415_SM.pdf]

[advances.sciencemag.org/cgi/content/full/6/32/eaba8415/DC1](https://advances.sciencemag.org/cgi/content/full/6/32/eaba8415/DC1)

## Supplementary Materials for

### **Daxx maintains endogenous retroviral silencing and restricts cellular plasticity in vivo**

Amanda R. Wasylishen\*, Chang Sun, Sydney M. Moyer, Yuan Qi, Gilda P. Chau, Neeraj K. Aryal, Florencia McAllister,  
Michael P. Kim, Michelle C. Barton, Jeannelyn S. Estrella, Xiaoping Su, Guillermina Lozano\*

\*Corresponding author. Email: [awasylishen@mdanderson.org](mailto:awasylishen@mdanderson.org) (A.R.W.); [gglozano@mdanderson.org](mailto:gglozano@mdanderson.org) (G.L.)

Published 5 August 2020, *Sci. Adv.* **6**, eaba8415 (2020)  
DOI: 10.1126/sciadv.aba8415

#### **The PDF file includes:**

Figs. S1 to S4  
Table S2

#### **Other Supplementary Material for this manuscript includes the following:**

(available at [advances.sciencemag.org/cgi/content/full/6/32/eaba8415/DC1](https://advances.sciencemag.org/cgi/content/full/6/32/eaba8415/DC1))

Tables S1, S3 to S6

**Fig. S1**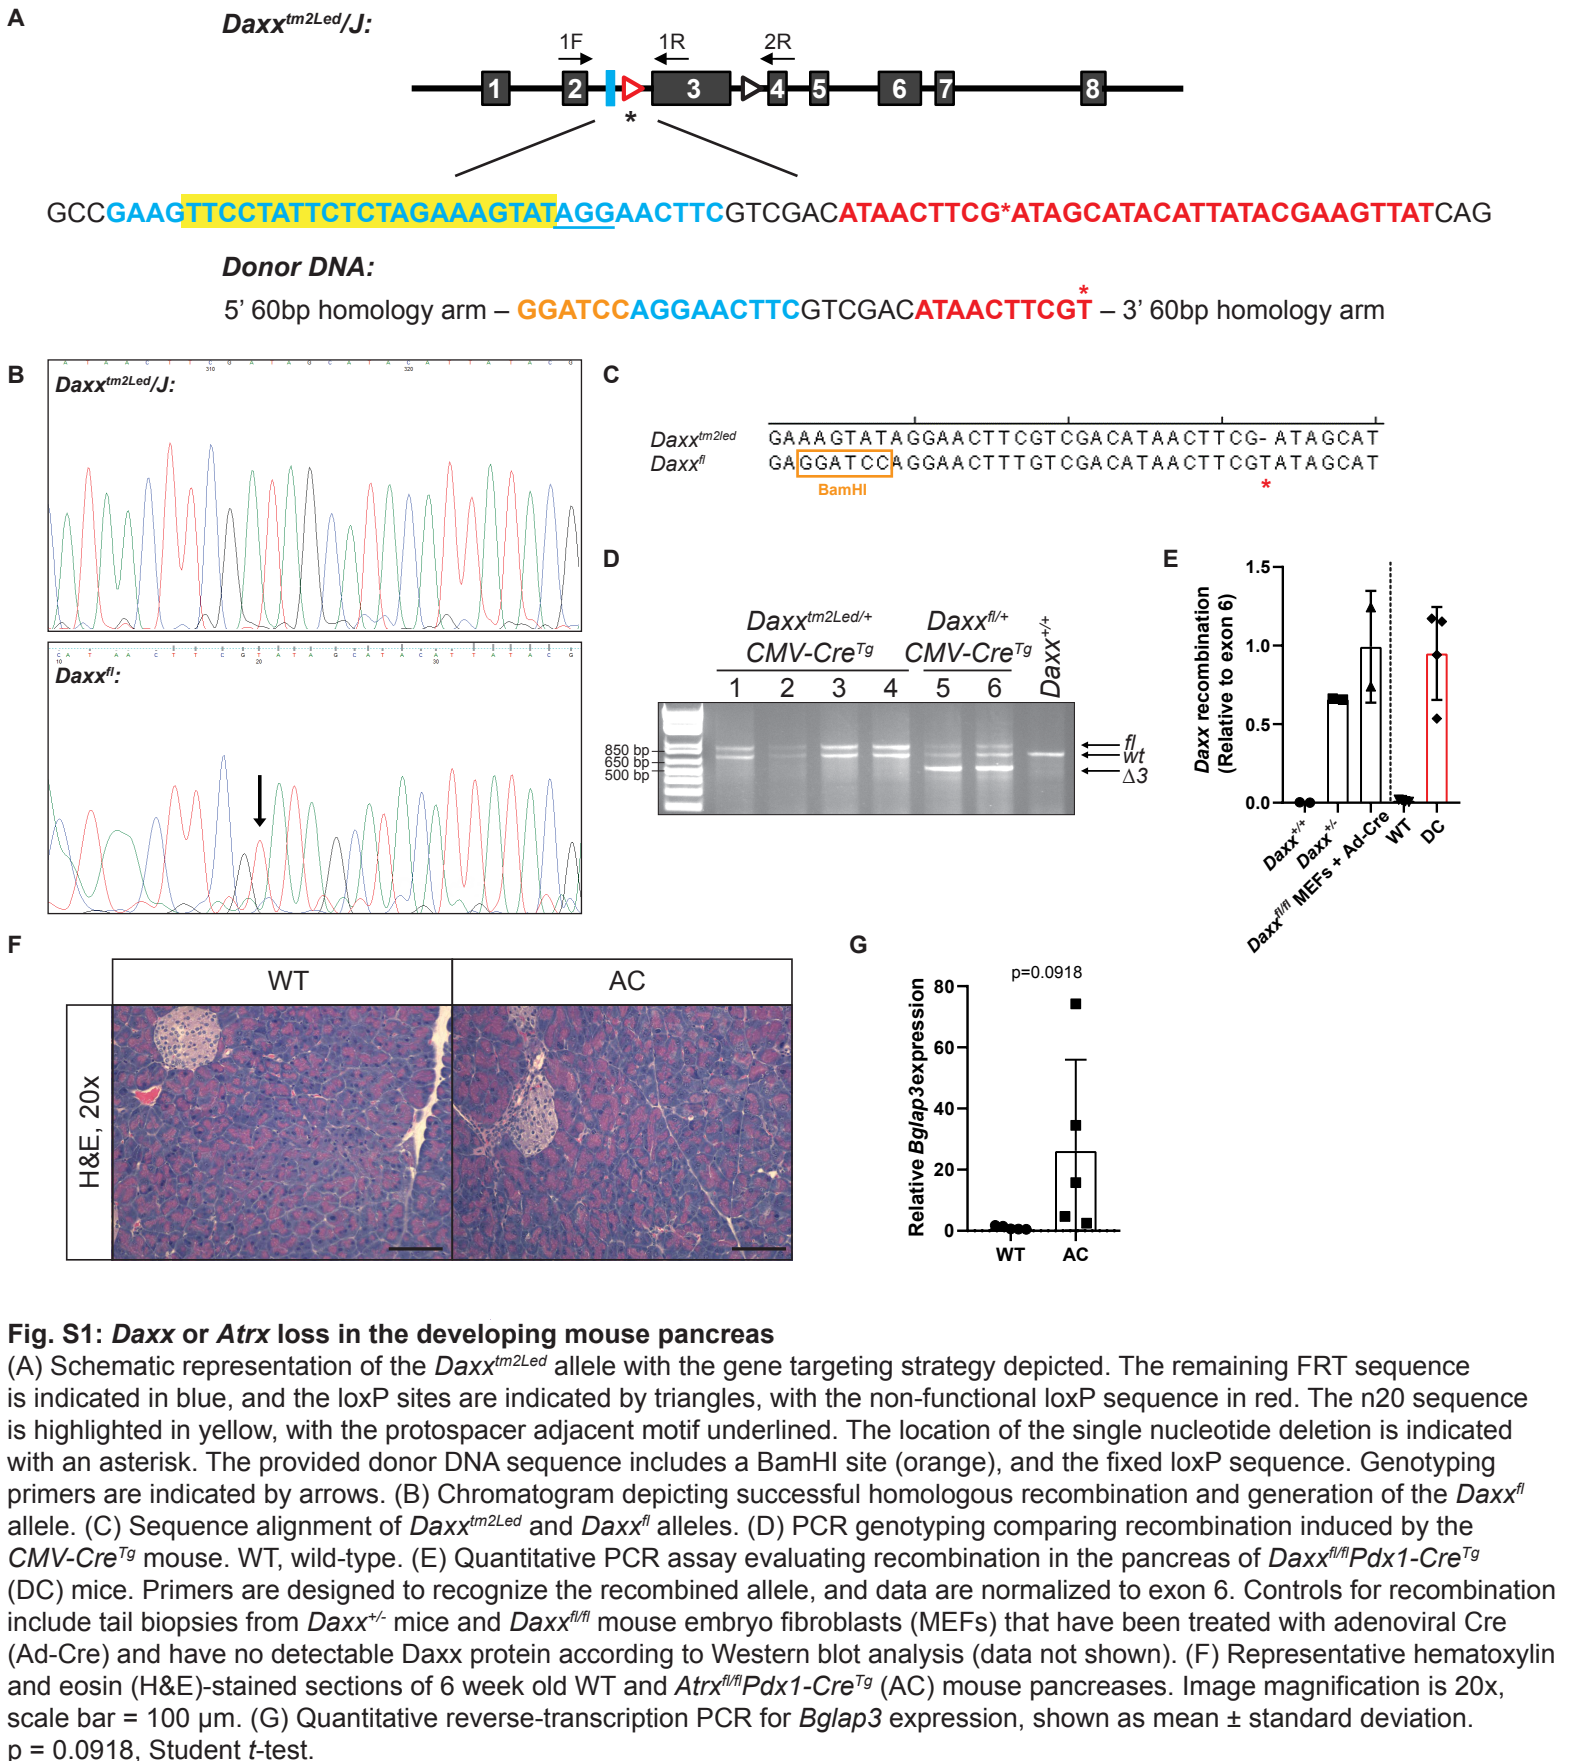

**Fig. S2**

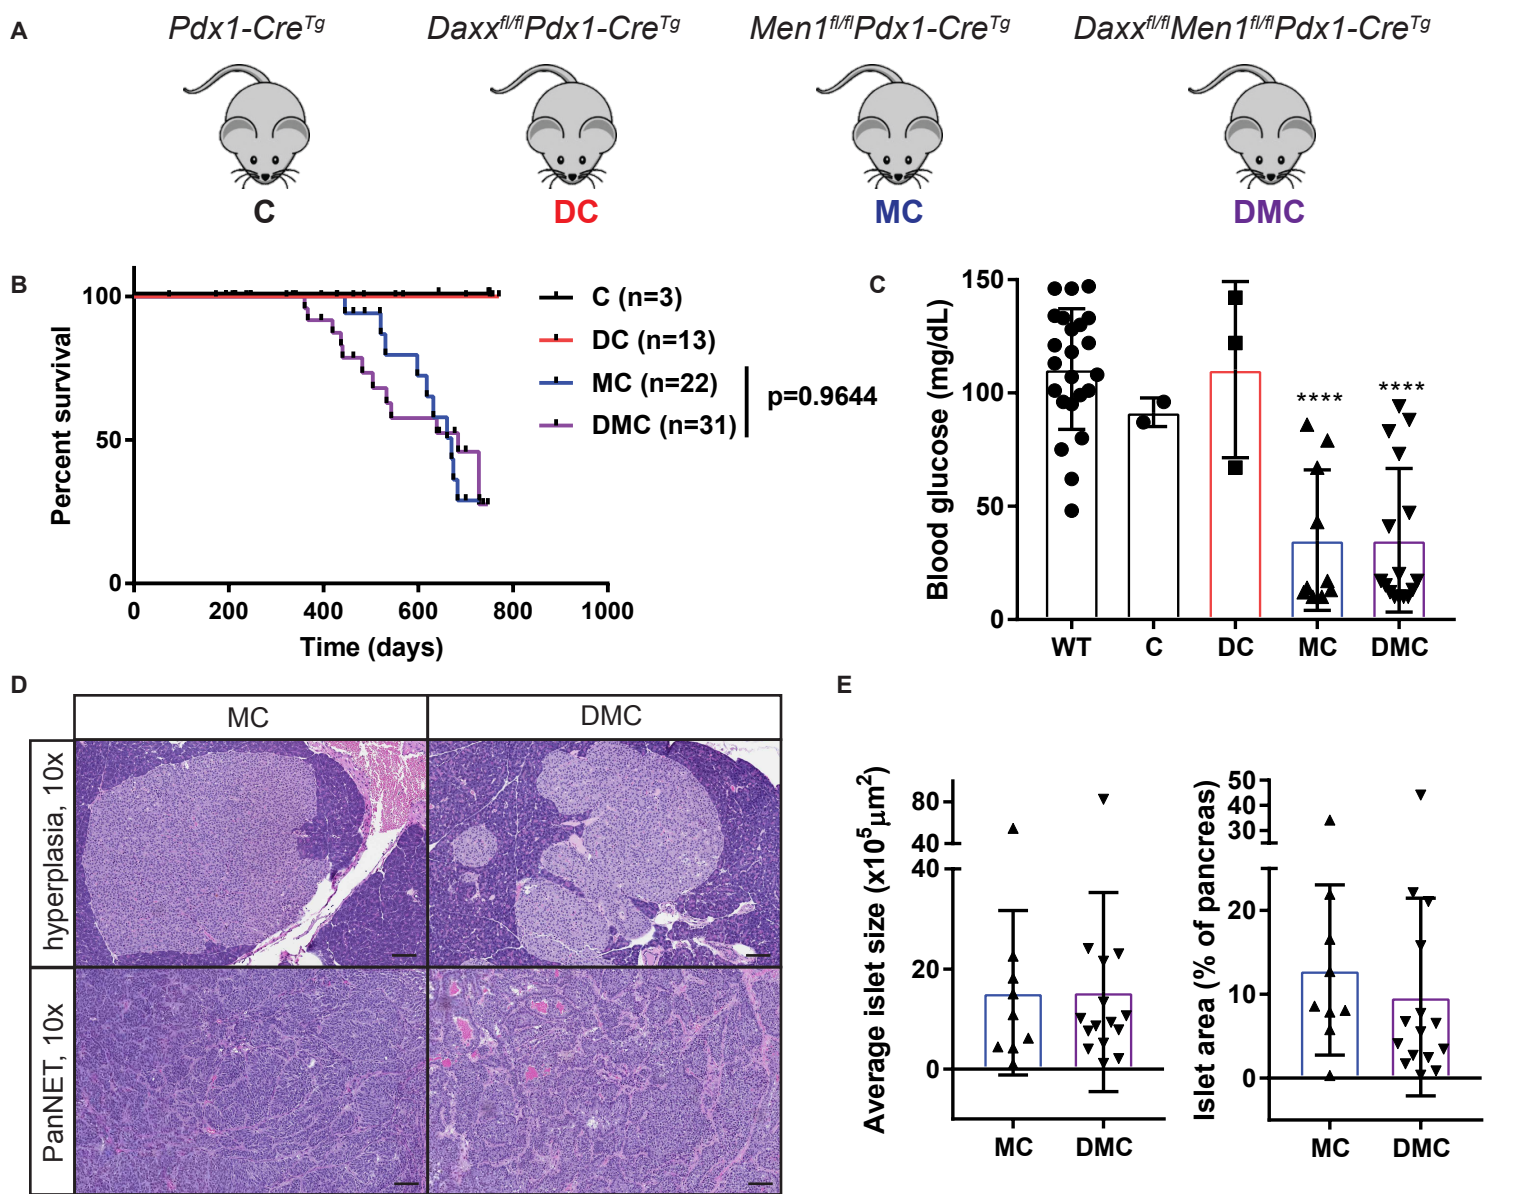

**Fig. S2: *Daxx* loss does not cooperate with *Men1*-deficiency to promote endocrine tumorigenesis in mice**

(A) Schematic representation and short form notation of mice in cohort. C, *Pdx1-Cre<sup>Tg</sup>*; DC, *Daxx<sup>fl/fl</sup>Pdx1-Cre<sup>Tg</sup>*; MC, *Men1<sup>fl/fl</sup>Pdx1-Cre<sup>Tg</sup>*; DMC, *Daxx<sup>fl/fl</sup>Men1<sup>fl/fl</sup>Pdx1-Cre<sup>Tg</sup>*. (B) Kaplan-Meier survival analysis. The C and DC mice are the same as those presented in Figure 1D. (C) Non-fasting blood glucose analysis of mice at necropsy (mean  $\pm$  standard deviation). \*\*\*\*,  $p < 0.0001$ , analysis of variance with Dunnett multiple comparisons test relative to wild-type (WT) mice. (D) Representative hematoxylin and eosin-stained images of hyperplasias and pancreatic neuroendocrine tumors observed in MC and DMC mice. Image magnification is 10x, scale bar = 100  $\mu\text{m}$ . (E) Quantification of the endocrine pancreas compartment in DMC compared to MC mice (mean  $\pm$  standard deviation).

**Fig. S3**

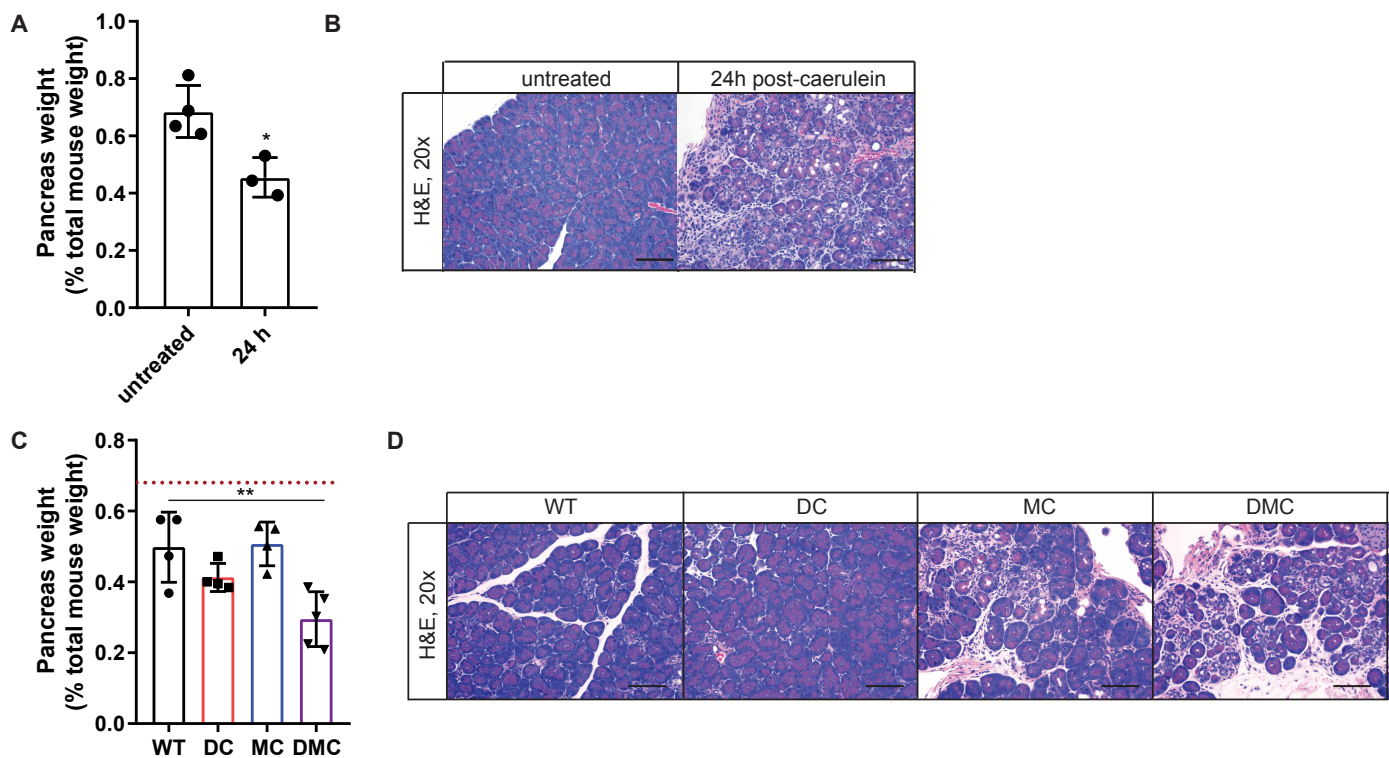

**Fig. S3: Response to chronic pancreatitis**

(A) Pancreas weight of wild-type (WT) mice 24 hours following treatment with caerulein or no treatment (mean  $\pm$  standard deviation). \* $p < 0.05$ , Student  $t$ -test. (B) Representative hematoxylin and eosin (H&E)-stained images of wildtype mouse pancreas sections 24 hours following the final dose of caerulein or no treatment. Image magnification is 20x, scale bar = 100  $\mu\text{m}$ . (C) Pancreas weight 5 days following the final dose of caerulein (mean  $\pm$  standard deviation). The dotted line represents the average weight of an untreated WT pancreas. \*\* $p < 0.01$ , analysis of variance with Dunnett post-test relative to caerulein-treated WT. DC, *Daxx<sup>fl/fl</sup>Pdx1-Cre<sup>Tg</sup>*; MC, *Men1<sup>fl/fl</sup>Pdx1-Cre<sup>Tg</sup>*; DMC, *Daxx<sup>fl/fl</sup>Men1<sup>fl/fl</sup>Pdx1-Cre<sup>Tg</sup>*. (D) Representative H&E-stained images 5 days following the final dose of caerulein. Images magnification is 20x, scale bar = 100  $\mu\text{m}$ .

Fig. S4

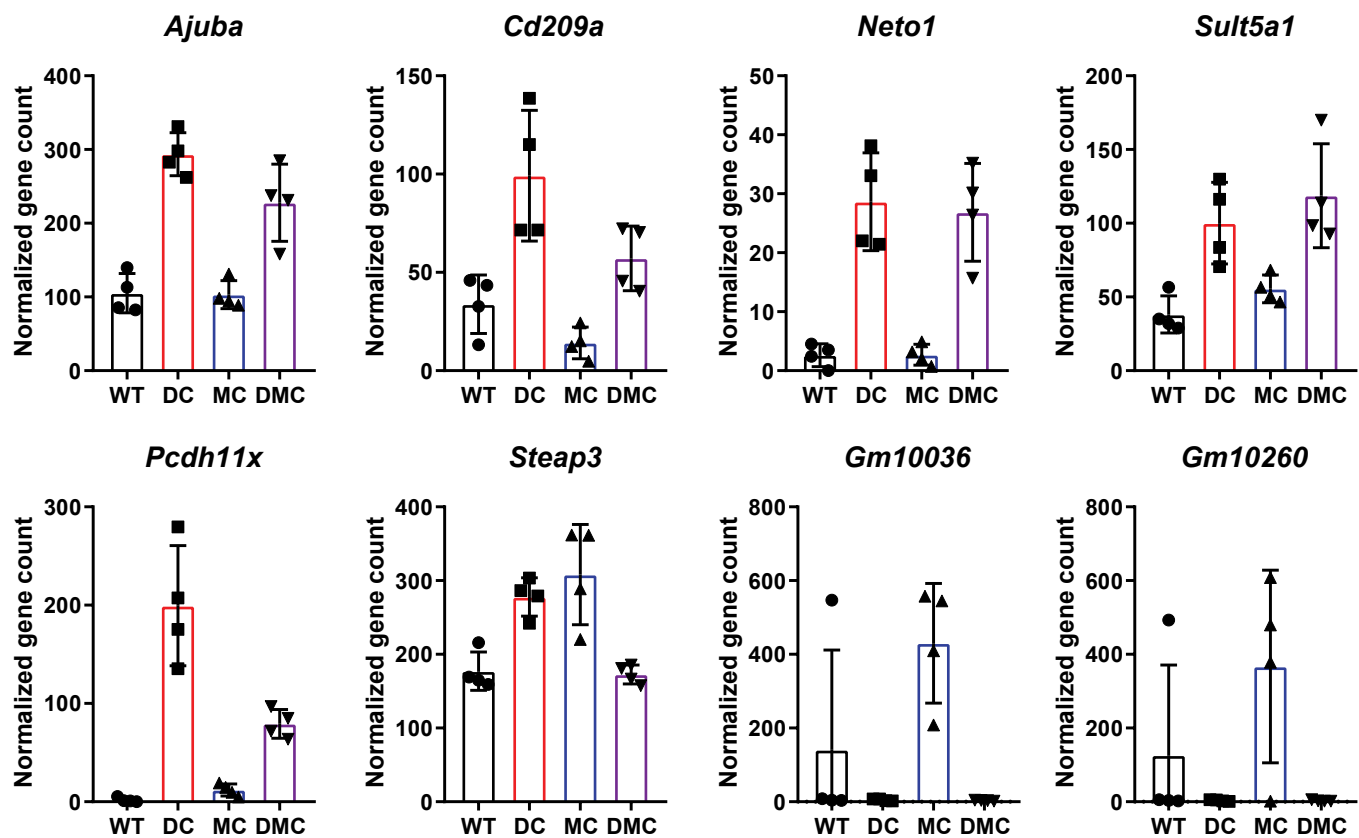

Fig S4: Daxx-dependent gene expression changes from RNA sequencing data

Base means from RNA sequencing data of common genes from comparison between genotypes (mean  $\pm$  standard deviation). WT, wild-type; DC, *Daxx<sup>fl/fl</sup>Pdx1-Cre<sup>Tg</sup>*; MC, *Men1<sup>fl/fl</sup>Pdx1-Cre<sup>Tg</sup>*; DMC, *Daxx<sup>fl/fl</sup>Men1<sup>fl/fl</sup>Pdx1-Cre<sup>Tg</sup>*.

**Table S2: Significant Daxx-dependent gene expression changes in genes that define pancreas cell types**

| Cell type                       | Gene             | DC vs WT            |                         |
|---------------------------------|------------------|---------------------|-------------------------|
|                                 |                  | Log <sub>2</sub> FC | P <sub>adj</sub>        |
| Epsilon <sup>1</sup>            | <i>Sptssb</i>    | 4.04                | 4.90 x 10 <sup>-2</sup> |
|                                 | <i>Prox1</i> *   | 0.65                | 4.11 x 10 <sup>-2</sup> |
| Duct <sup>1</sup>               | <i>Mmp7</i>      | 1.82                | 1.69 x 10 <sup>-2</sup> |
|                                 | <i>Onecut2</i> * | 2.24                | 1.38 x 10 <sup>-2</sup> |
| Mesenchyme <sup>1</sup>         | <i>Col1a1</i>    | 1.11                | 1.96 x 10 <sup>-2</sup> |
|                                 | <i>Col1a2</i>    | 0.91                | 1.61 x 10 <sup>-2</sup> |
|                                 | <i>Col3a1</i>    | 0.89                | 1.71 x 10 <sup>-2</sup> |
|                                 | <i>Col5a1</i>    | 0.89                | 2.90 x 10 <sup>-3</sup> |
|                                 | <i>Fbn1</i> *    | 0.76                | 2.59 x 10 <sup>-2</sup> |
|                                 | <i>Prrx1</i> *   | 1.25                | 1.39 x 10 <sup>-3</sup> |
| Alpha <sup>1</sup>              | <i>Plce1</i>     | 0.97                | 1.12 x 10 <sup>-2</sup> |
|                                 | <i>Gc</i>        | 1.09                | 2.42 x 10 <sup>-2</sup> |
| Delta <sup>1</sup>              | <i>Hhex</i> *    | 0.73                | 1.93 x 10 <sup>-2</sup> |
| Stellate <sup>2</sup>           | <i>Mmp2</i>      | 0.98                | 2.91 x 10 <sup>-3</sup> |
|                                 | <i>Fgf2</i>      | 0.94                | 1.73 x 10 <sup>-2</sup> |
|                                 | <i>Col1a1</i>    | 1.11                | 1.96 x 10 <sup>-2</sup> |
|                                 | <i>Pdgfra</i>    | 0.68                | 4.31 x 10 <sup>-2</sup> |
| Standard                        | <i>Col1a1</i>    | 1.10                | 1.96 x 10 <sup>-2</sup> |
| Activated stellate <sup>2</sup> | <i>Timp3</i>     | 0.85                | 2.66 x 10 <sup>-2</sup> |
|                                 | <i>Col6a1</i>    | 0.75                | 4.76 x 10 <sup>-2</sup> |
|                                 | <i>Col1a2</i>    | 0.91                | 1.60 x 10 <sup>-2</sup> |
|                                 | <i>Col3a1</i>    | 0.89                | 1.71 x 10 <sup>-2</sup> |
|                                 | <i>Ctgf</i>      | 1.44                | 3.49 x 10 <sup>-3</sup> |

\*=transcription factor

References: <sup>1</sup>Muraro et al., 2016, Cell Systems 3, 385–394; <sup>2</sup>Baron et al., 2017, Cell Systems 3(4), 346-360. DC, *Daxx*<sup>fl/fl</sup>*Pdx1-Cre*<sup>Tg</sup>; WT, wild-type.
